# Supplementary material for: Health service improvement using positive patient feedback: Systematic scoping review
Source: PubMed Central journal article supplement (PMC10553339; doi:10.1371/journal.pone.0275045), 2023-10-05
Supplement: pone.0275045.s001.pdf [file pone.0275045.s001.pdf]

## Amended search strategy for CINAHL and ASSIA

1. TI "health\* staff" or AB "health\* staff"
2. TI "health\* worker\*" or AB "health\* worker\*"
3. TI "medical staff" or AB "medical staff"
4. TI "medical worker\*" or AB "medical worker\*"
5. MW Health Personnel
6. TI "health\* system\*" or AB "health\* system"
7. TI "health\* service\*" or AB "health\* service\*"
8. TI "health\* organi#ation\*" or AB "health\* organi#ation\*"
9. TI "health\* communit\*" or AB "health\* communit\*"
10. (S1 OR S2 OR S3 OR S4 OR S5 OR S6 OR S7 OR S8 or S9)
11. TI "grat\*" or AB "grat\*"
12. TI "appreciat\*" or AB "appreciat\*"
13. TI "recog\*"
14. TI "thank\*"
15. TI "positive\* feedback" or AB "positive\* feedback"
16. TI "positive\* evaluat\*" or AB "positive\* evaluat\*"
17. TI "praise\*" or AB "praise\*"
18. (S11 OR S12 OR S13 OR S14 OR S15 OR S16 OR S17)
19. (S10 AND S18)

## Searches conducted on the ACM Digital Library

1. Health\* staff AND grat\*
2. Health\* staff AND appreciat\*
3. Health\* staff AND positive\* feedback
4. Health\* staff AND positive evaluat\*
5. Health\* worker\* AND grat\*
6. Health\* worker\* AND appreciat\*
7. Health\* worker\* AND positive\* feedback
8. Health\* worker\* AND positive\* evaluat\*
9. Health\* system\* AND grat\*
10. Health\* system\* AND appreciat\*
11. Health\* system\* AND positive\* feedback
12. Health\* system\* AND positive\* evaluat\*
13. Health\* service\* AND grat\*
14. Health\* service\* AND appreciat\*
15. Health\* service\* AND positive\* feedback
16. Health\* service\* AND positive\* evaluat\*

This work is licensed under the Creative Commons Attribution 4.0 International License. To view a copy of this license, visit <http://creativecommons.org/licenses/by/4.0/> or send a letter to Creative Commons, PO Box 1866, Mountain View, CA 94042, USA. To attribute the authors, cite as: Lloyd R and Rennick-Egglestone S. Search strategies for a systematic review on positive patient feedback (2022). Include the URL where the file was published in this citation.
